# Supplementary material
Source: HighWire-hosted journal article supplement (http://cmajopen.ca/highwire/filestream/81205/field_highwire_adjunct_files/0/original-submission.pdf)
Supplement: original-submission.pdf [file original-submission.pdf]

1 **Burn injuries resulting from illegal cannabis oil manufacturing: review of 12 cases**  
2 **and a synthesis of the literature to guide Canadian cannabis policy.**

3 Sarthak Sinha<sup>1,3\*</sup>, Kyle Ricord, MD<sup>1,2\*</sup>, Patricia Harasym, PhD<sup>1,3</sup>, Waleed Rahmani<sup>2,3</sup>,  
4 Jeff A. Biernaskie, PhD<sup>3</sup>, Duncan Nickerson, MD<sup>4,5</sup>, Vincent A. Gabriel, MSc, MD<sup>1,4‡</sup>

5 **Affiliation(s) for each author:**

6 <sup>1</sup> Division of Physical Medicine and Rehabilitation, Departments of Clinical  
7 Neurosciences, Pediatrics and Surgery, Faculty of Medicine, University of Calgary.

8 <sup>2</sup> Faculty of Medicine, University of Calgary.

9 <sup>3</sup> Department of Comparative Biology & Experimental Medicine, Faculty of Veterinary  
10 Medicine, University of Calgary.

11 <sup>4</sup> Calgary Firefighters' Burn Treatment Centre, Canada.

12 <sup>5</sup> Section of Plastic Surgery, Department of Surgery, University of Calgary, Alberta,  
13 Canada.

14 \*Authors made equal contributions.

15 ‡**Corresponding Author:** Vincent Gabriel, MD, MSc, FRCPC.

16 AC122 SSB, Foothills Medical Centre,  
17 1403-29 Street NW Calgary, AB T2N 2T9, Canada.

18 Phone: 403-944-5917; Fax: 403-944-8578; Email: [vince.gabriel@albertahealthservices.ca](mailto:vince.gabriel@albertahealthservices.ca)

19 **Funding statement:** This work was funded by an Alberta Innovates (AI) CRIO grant to  
20 V.G. and J.B. S.S. was supported by AI (2015) and Alberta Children's Hospital Research  
21 Institute (2016) studentships. W.R. was supported by an AI MD-PhD studentship.

22 **Declaration of author(s) competing interests:** No conflict of interest (commercial or  
23 political) were declared.

1  
2  
3 24 **ABSTRACT (246/250 words):**  
4

5 25 **Background:** The increasing consideration of cannabis legalization in Canada and the  
6  
7  
8 26 US has motivated physicians to assess its prospective impact on the health care system. A  
9  
10  
11 27 particular concern within the burns community are injuries sustained as a result of the  
12  
13 28 illegal manufacturing of cannabis oil. Cannabis oil is isolated from *Cannabis sativa* and  
14  
15 29 *Cannabis indica* vegetation as a method to enhance its potency and involves highly  
16  
17  
18 30 flammable reagents.

19  
20 31 **Methods:** We first synthesize clinical features unique to cannabis oil burn injuries from 5  
21  
22 32 published case series (4 from the US, 1 from New Zealand). We then expand this  
23  
24 33 repertoire by analyzing 12 cannabis oil burn injuries treated over a 2-year review period  
25  
26  
27 34 at the Foothills Medical Centre in Alberta, Canada.

28  
29 35 **Results:** 190 cases from 6 independent investigations converge in suggesting that  
30  
31 36 cannabis oil burn patients (in comparison to all burn admissions): a) are younger, b)  
32  
33 37 males are overrepresented, c) sustain a larger TBSA burns, d) require higher surgical  
34  
35  
36 38 management, and e) spend more time at the hospital.

37  
38  
39 39 **Interpretation:** Since Bell et al. found an increase in the frequency of cannabis oil burns  
40  
41 40 following cannabis liberalization in Colorado, similar trends might recapitulate in  
42  
43 41 Canada. To safeguard against this, we formulate a three-pronged approach to serve as an  
44  
45 42 adjunct to cannabis liberalization policies. We recommend to: a) monitor trends in  
46  
47 43 cannabis oil burn injuries, b) educate the public and tertiary burn units about cannabis oil  
48  
49 44 burns, and c) encourage regulation of cannabis oil production to reduce risk of injury.  
50

51 45 **Key words:** Burns, cannabis oil manufacturing, Canada, cannabis liberalization.  
52

53 46 **Abbreviations:**  $\delta$ -9-tetrahydrocannabinol (THC); Total body surface area (TBSA)  
54  
55  
56  
57  
58  
59  
60

## 1. INTRODUCTION:

Following their victory in the 2015 federal election, Prime Minister Justin Trudeau and his cabinet assembled a national task force to establish a framework for cannabis legalization in Canada. A key objective of this task force was to formulate evidence-informed policy recommendations by analyzing data from jurisdictions that legalized cannabis for non-medicinal use (i.e. Colorado, Washington State). A prominent recommendation of the task force was the need to assess how changes in cannabis availability will impact public health risks in Canada, and whether foreseeable changes in health care costs can be prospectively identified [1]. To this end, an analysis of how cannabis legalization might impact different aspects of Canadian's health is timely to guide the development of federal policy.

Here, we focus on hydrocarbon burns as a result of explosions during illegal cannabis oil manufacturing and its potential to become a growing problem in Canada. Cannabis oil (or "hash oil") is a highly potent  $\delta$ -9-tetrahydrocannabinol (THC) concentrate which contains up to 90% THC [2]. The most common method to concentrate THC employs compressed short-chain hydrocarbons (i.e. butane) as solvents. Since butane gas is heavier than the ambient air, in the absence of proper ventilation apparatus, butane vapors can reach ignitable range (2–8%) and can catch fire in the presence of static electricity and open flame sources [2]. The extracted oil may be further purified by alkali washing (using nonpolar solvents such as petroleum ether) to remove heavy aromatic carboxylic acids and to enhance its taste. Clandestine distilleries are particularly vulnerable to fire burns as safety measures necessary to prevent butane vapor accumulation (i.e. fume ventilation, hazardous waste disposal) are often neglected [3].

1  
2  
3 70 Evidence of clandestine distilleries proliferating in North America comes from butane  
4  
5 71 cannabis oil confiscations between 2000 to 2007 being 3-fold higher compared to 1993 to  
6  
7  
8 72 2000 period [4]. Additionally, the increased availability of cannabis (as a result of  
9  
10 73 cannabis legalization or decriminalization) has been associated with a significant increase  
11  
12 74 in the number of cases presented with such burns in US states like Colorado [5].  
13  
14  
15 75 Cannabis is expected to become more accessible in Canada, but the impact of such policy  
16  
17 76 changes on hydrocarbon burns is not known. This investigation reports the first Canadian  
18  
19 77 case series asking what constitutes a cannabis oil burn patient. We found younger males  
20  
21 78 were overrepresented in the cannabis oil burn patient population, and these burns covered  
22  
23 79 larger TBSA and resulted in extended hospital stay. We expand our study by providing  
24  
25 80 cost estimates of treating cannabis oil burn injuries, and formulate a three-pronged  
26  
27 81 approach to safeguard against this potential public health risk.  
28  
29  
30

## 31 82 **2. METHORDS:**

### 32 83 **2.1. Literature Search Strategy.**

33  
34  
35 84 The articles concerning cannabis oil burns were found by searching Ovid MEDLINE(R)  
36  
37 85 In-Process & Other Non-Indexed Citations (1966-March 2017) using the text words  
38  
39 86 'hash oil burns', 'cannabis oil burns', 'honey oil burns' and 'marijuana burns'. PubMed  
40  
41 87 & PubMed Clinical Queries were also searched within the same dates. Reference lists of  
42  
43 88 the journal articles returned were then hand searched. Only non-human and non-English  
44  
45 89 language studies were excluded.  
46  
47  
48

### 49 90 **2.2. Retrospective Chart Review.**

50  
51 91 We performed a retrospective chart review of all burn admissions treated at the  
52  
53 92 Firefighters Burn Treatment Centre at Foothills Medical Centre in Calgary, AB from  
54  
55  
56  
57  
58  
59  
60

1  
2  
3 93 April 2012 to March 2014. This study was approved by the Conjoint Health Research  
4  
5 94 Ethics Board at the University of Calgary. Charts were first reviewed for the description  
6  
7  
8 95 of event and cannabis oil burn patients were identified where there was evidence of  
9  
10 96 combustion during cannabis oil manufacturing. We then reviewed for age, gender, burn  
11  
12 97 anatomical site, %TBSA burn, burn depth, surgical procedures performed, admission  
13  
14  
15 98 duration, and post-discharge outcome.  
16

### 17 99 **2.3. Statistical Analysis.**

20 100 Statistical analysis was performed using GraphPad Prism version 4.0 for Windows, and  
21  
22 101 no samples were excluded from the dataset. Unpaired *t* tests, two-tailed, with Welch  
23  
24 102 correction, was used to assess whether admission duration and % TBSA of the cannabis  
25  
26 103 oil burns were significantly different from the total burn admission. Pearson's chi-square  
27  
28 104 was used to assess differences in age and anatomical site distribution. Fisher exact test,  
29  
30  
31 105 two-sided, was used instead of  $\chi^2$  to assess association between gender.  
32

## 34 106 **3. RESULTS:**

### 36 107 **3.1. Case Series**

38 108 Our chart audit found that 12 (7.5%) out of 161 patients sustained burns from  
39  
40 109 cannabis oil manufacturing over the review period. Of the 12 patients identified, 10  
41  
42 110 were admitted by ground ambulance, 1 from air ambulance, and 1 was brought in by  
43  
44 111 the local police (Table 2). In the total burn admission group, majority (19%) of burn  
45  
46 112 victims were aged 41-50 years whereas 9 (75%) of cannabis oil burns were under the  
47  
48 113 age of 41 ( $p = 0.82$ , Figure 1A, Table 2). Males constituted 83% of cannabis oil burn  
49  
50 114 patients compared to 74% in the total burn admission group ( $p=0.73$ , Figure 1B). The  
51  
52 115 mean TBSA of cannabis oil burn patients was 24% (interquartile range (IQR): 8, 37,  
53  
54  
55  
56  
57  
58  
59  
60

1  
2  
3 116 range 3–70%) compared to 9% (IQR: 2, 11, range 0.5-70%) in total burn admission  
4  
5 117 (p = .043; Figure 1C, Table 2). The mean admission duration of cannabis oil burn  
6  
7  
8 118 patients was 32 days (interquartile range (IQR): 19, 49, range 3–69 days) compared to  
9  
10 119 17 days (IQR: 5, 19, range 1-138 days) in total burn admission (p = .021; Figure 1D,  
11  
12 120 Table 2). Face (67%) and neck (67%) were the most frequently inflicted anatomical  
13  
14 121 sites in cannabis oil burns whereas burns to the face (31%) and hand (28%) were  
15  
16 122 most frequent in the total burn admission group (Figure 1E, Table 2). Surgical  
17  
18 123 debridement, followed by split-thickness skin graft, were required in 9 (75%)  
19  
20 124 cannabis oil burns. Inhalation injuries were sustained by 3 (25%) cannabis oil burn  
21  
22 125 patients and 1 patient succumbed to his injuries.  
23  
24  
25  
26

### 27 126 **3.2. Literature Review**

28  
29 127 We identified 190 patients with cannabis oil burns from 6 case series reported in the  
30  
31 128 English literature for whom clinical data was available [3][5][6][7][8] (Table 1,  
32  
33 129 Figure 3). These studies were published between 2004 – 2017 and majority (4 out of  
34  
35 130 6) were based on chart audits performed in American tertiary burn care centers. Based  
36  
37 131 on studies which reported gender, there were 144 males and 15 females, giving an  
38  
39 132 M:F ratio of 9.6:1. The age of cannabis oil burn patients ranged from 2 – 55 year,  
40  
41 133 with a mean of 43 years (n=118). The TBSA ranged from 0.5 - 95%, with a mean of  
42  
43 134 23.9% (n=159). Admission duration ranged from 0 - 513 days, with a mean of 28.3  
44  
45 135 days (n=159). Skin grafting was performed in 55.3% (n=190) of cannabis oil burn  
46  
47 136 cases and average mortality in this group was 2.6% (n=151).  
48  
49  
50  
51  
52

### 53 137 **4. INTERPRETATION:**

54  
55  
56  
57  
58  
59  
60

1  
2  
3 138 Cannabis oil is isolated from *Cannabis* vegetation to concentrate THC. This  
4  
5 139 extraction requires the raw cannabis to be boiled in volatile solvents such as butane.  
6  
7  
8 140 Since extractions are currently performed in non-regulated distilleries, improper butane  
9  
10 141 ventilation makes them vulnerable to explosions resulting in fire burns. Such a risk is  
11  
12 142 dramatically exacerbated if evaporation is hastened by heating the butane-cannabis  
13  
14  
15 143 mixture on a heat source. Here, we sought to characterize features unique to cannabis oil  
16  
17 144 burn patients and discuss the potential impact of Canada's proposed cannabis legalization  
18  
19 145 by July 1, 2018 [9] on these injuries. To our knowledge, this is the first Canadian chart  
20  
21 146 audit, and we pooled findings from 6 case series to highlight emerging trends. We found  
22  
23 147 converging evidence suggesting cannabis oil burn patients were: a) young (43 years), b)  
24  
25 148 males were overrepresented (M:F = 9.6:1), c) sustained large TBSA burns (23.9%), d)  
26  
27 149 required extensive surgical management (skin grafting in 55.3% of cases), and e) spent a  
28  
29 150 significant amount of time (28.3 days) at the burn unit. To place these findings in context,  
30  
31 151 American Burn Association's National Burn Repository (NBR) from 2006 to 2015 found  
32  
33 152 M:F ratio of 2.1:1 based on 205,033 burn cases reported from 96 U.S. hospitals.  
34  
35 153 Although an average TBSA is not reported, NBR found that more than 75% of total burn  
36  
37 154 sizes were less than 10% TBSA and 90% of all cases had a burn surface area of 20% or  
38  
39 155 less. Similarly, NBR found the average length of stay was around 9 days [10]. Our  
40  
41 156 findings for cannabis oil burns parallel previously published reports on other illicit drug-  
42  
43 157 associated burns. For example, methamphetamine production requires mixing volatile  
44  
45 158 chemicals which can inflict burn injuries from explosions and chemical spills. These burn  
46  
47 159 victims were also young (32 years), males were overrepresented by a similar proportion  
48  
49 160 (M:F = 10.3:1), and average TBSA was 18.86% [11].  
50  
51  
52  
53  
54  
55  
56  
57  
58  
59  
60

1  
2  
3 161 Of particular concern is that the frequency of cannabis oil burns may increase in  
4  
5 162 Canada due to an increase in cannabis accessibility. Evidence for this comes from  
6  
7  
8 163 longitudinal retrospective chart reviews which found U.S. state liberalization in cannabis  
9  
10 164 policy correlated with a dramatic increase in the number of patients presenting with  
11  
12 165 cannabis oil burns [3] [5]. There are two suspected reasons for this increase. First, the  
13  
14 166 market value of butane cannabis oil is significantly higher than trimmed cannabis buds  
15  
16 167 (\$700 USD per ounce vs. ≈\$120 USD per ounce) [5]. Second, the perceived ease of  
17  
18 168 extraction tempts people to set up their own distillation apparatus without exercising  
19  
20 169 appropriate caution. Since an increase in cannabis oil burns can pose a significant  
21  
22 170 economic and psychosocial burden on the Canadian burn centers, we propose a three-  
23  
24 171 pronged approach which can serve as an adjunct to Canadian cannabis liberalization  
25  
26 172 policy.

27  
28  
29 173 First, Canadian burn centers are encouraged to initiate prospective monitoring of  
30  
31 174 cannabis oil-related injuries and promptly report changes in frequency or demographics  
32  
33 175 of patients with this burn mechanism. This is important because a major tenet of the  
34  
35 176 current government's policy proposal is to reduce clandestine cannabis production and  
36  
37 177 restrict cannabis access for kids and young adults [1]. An increase in cannabis oil burns  
38  
39 178 or an increased representation of the younger demographic with such burns can serve as  
40  
41 179 an indicator of policy's efficacy in achieving its mandate. Second, burn centers should be  
42  
43 180 encouraged to design public educational programs aimed at increasing awareness about  
44  
45 181 the risks of butane cannabis oil extraction in collaboration with national drug  
46  
47 182 enforcement and health agencies such as the Royal Canadian Mounted Police and Health  
48  
49 183 Canada. First responders and medical staff at burn centers should also be made aware of  
50  
51  
52  
53  
54  
55  
56  
57  
58  
59  
60



1  
2  
3 184 features unique to cannabis oil burn patients so resources can be allocated appropriately.  
4  
5 185 Third, and most importantly, cannabis oil production and distribution should be  
6  
7  
8 186 addressed in the proposed legislation to reduce the incentive of operating high-risk  
9  
10  
11 187 distilleries. Currently, there are 41 licensed cannabis producers in Canada who are  
12  
13 188 authorized to sell cannabis-related products (including cannabis oil) to people with valid  
14  
15 189 medical prescriptions [12]. Either expanding their license to include selling hash oil for  
16  
17 190 recreational use or mandating retailers to only sell products from approved distributors  
18  
19  
20 191 can diminish the demand for high-risk clandestine distilleries. Additionally, the  
21  
22 192 regulation on manufacturing should include provisions for adequate workplace safety if  
23  
24 193 using butane as a solvent or alternative measures such as high-pressure CO2 should be  
25  
26  
27 194 employed for mass manufacturing. Taken together, inclusion of these policy adjuncts can  
28  
29 195 promote health messaging, standardize the manufacturing process, and ensure safety of  
30  
31 196 distillery workers to reduce the risk of significant burn injuries.  
32  
33

34 197

35  
36 198

37  
38 199

39  
40 200

41  
42 201

43  
44 202

45  
46 203

47  
48 204

49  
50 205

51  
52 206

53  
54  
55  
56  
57  
58  
59  
60

207 **REFERENCES:**

- 208 1. Task Force on Cannabis Regulation and Legalization (2016). Framework for the  
209 legalization and regulation of cannabis in Canada: The final report of the task  
210 force on. Ottawa: Health Canada.
- 211 2. Raber, J. C., Elzinga, S., & Kaplan, C. (2015). Understanding dabs:  
212 contamination concerns of cannabis concentrates and cannabinoid transfer during  
213 the act of dabbing. *J Toxicol Sci*, 40(6), 797-803.
- 214 3. Jensen, G., Bertelotti, R., Greenhalgh, D., Palmieri, T., & Maguina, P. (2015).  
215 Honey oil burns: a growing problem. *Journal of Burn Care & Research*, 36(2),  
216 e34-e37.
- 217 4. Mehmedic Z, Chandra S, Slade D, et al. Potency trends of  $\Delta^9$ -THC and other  
218 cannabinoids in confiscated cannabis preparations from 1993 to 2008. *J Forensic*  
219 *Sci* 2010;55:1209–17.
- 220 5. Bell, C., Slim, J., Flaten, H. K., Lindberg, G., Arek, W., & Monte, A. A. (2015).  
221 Butane hash oil burns associated with marijuana liberalization in  
222 Colorado. *Journal of medical toxicology*, 11(4), 422-425.
- 223 6. Porter, C. J. W., & Armstrong, J. R. (2004). Burns from illegal drug manufacture:  
224 Case series and management. *Journal of Burn Care & Research*, 25(3), 314-318.
- 225 7. Romanowski, K. S., Barsun, A., Kwan, P., Teo, E. H., Palmieri, T. L., Sen, S., ...  
226 & Greenhalgh, D. G. (2017). Butane hash oil burns: a 7-year perspective on a  
227 growing problem. *Journal of Burn Care & Research*, 38(1), e165-e171.
- 228 8. Monte, A. A., Zane, R. D., & Heard, K. J. (2015). The implications of marijuana  
229 legalization in Colorado. *JAMA*, 313(3), 241-242.
- 230 9. Cochrane, D. (2017, March 26). Liberals to announce marijuana will be legal by  
231 July 1, 2018. *CBC News*. Retrieved March 27, 2017, from  
232 <http://www.cbc.ca/news/politics/liberal-legal-marijuana-pot-1.4041902>
- 233 10. National Burn Repository n.d.  
234 <http://www.ameriburn.org/2016%20ABA%20Full.pdf> [Accessed 11 April 2017].
- 235 11. Danks, R. R., Wibbenmeyer, L. A., Faucher, L. D., Sihler, K. C., Kealey, G. P.,  
236 Chang, P., ... & Lewis III, R. W. (2004). Methamphetamine-associated burn

1  
2  
3 237 injuries: a retrospective analysis. *Journal of Burn Care & Research*, 25(5), 425-  
4 238 429.

5  
6  
7 239 12. Canada, G. O. (n.d.). Authorized Licensed Producers under the Marihuana for  
8 240 Medical Purposes Regulations. Retrieved April 11, 2017, from [http://www.hc-](http://www.hc-sc.gc.ca/dhp-mps/marihuana/info/list-eng.php)  
9 241 [sc.gc.ca/dhp-mps/marihuana/info/list-eng.php](http://www.hc-sc.gc.ca/dhp-mps/marihuana/info/list-eng.php)  
10  
11 242

12  
13  
14 243 **Figure 1 – Differential features of cannabis oil burn patients compared to 161 adult**  
15 244 **patients admitted over the 2-year review period.** The age distribution of cannabis oil  
16  
17 245 burn patients is compared to the total burn population by plotting the frequency of  
18  
19 246 patients which fall within the identified 10-year age range (A). The gender distribution  
20  
21 247 highlights a bias towards male burn victims and this bias is especially pronounced in the  
22  
23 248 cannabis oil burn group (B). Cannabis oil burn patients, on average, sustain a  
24  
25 249 significantly higher % TBSA burn (C) and spend a greater number of days at the burn  
26  
27 250 unit (D). Anatomical sites inflicted with burns is compared between the two groups by  
28  
29 251 plotting the percentage of patients which sustained burns to the identified site (E). Error  
30  
31 252 bars represent SEM. \* =  $p < 0.05$ .  
32  
33  
34  
35  
36  
37  
38  
39  
40  
41  
42  
43  
44  
45  
46  
47  
48  
49  
50  
51  
52  
53  
54  
55  
56  
57  
58  
59  
60

253  
254 **Figure 2 – Schematic summary of cannabis oil extraction from cannabis trimmings**  
255 **and clinical features unique to cannabis oil burn patients as identified from 190**  
256 **cases reported in the literature.**

257  
258 **Table 1 – Summary of findings from 190 patients reported in 6 published case**  
259 **series.**

260

1  
2  
3  
4  
5  
6  
7  
8  
9  
10  
11  
12  
13  
14  
15  
16  
17  
18  
19  
20  
21  
22  
23  
24  
25  
26  
27  
28  
29  
30  
31  
32  
33  
34  
35  
36  
37  
38  
39  
40  
41  
42  
43  
44  
45  
46  
47  
48  
49  
50  
51  
52  
53  
54  
55  
56  
57  
58  
59  
60

261 **Table 2 – Clinical features of 12 unique cannabis oil burn patients admitted over the**  
262 **review period.** F: face, N: neck, H: hand, W: wrist, C: chest, A: arm, B: back, T: thigh,  
263 L: leg, I: inhalation injury, RUE: right upper extremity, LUE: left upper extremity, LE:  
264 lower extremity, UE: upper extremity, EOB: excision of burns, STSG: split thickness  
265 skin graft, DL: decompressive laparotomy, DC: discharge.

Confidential

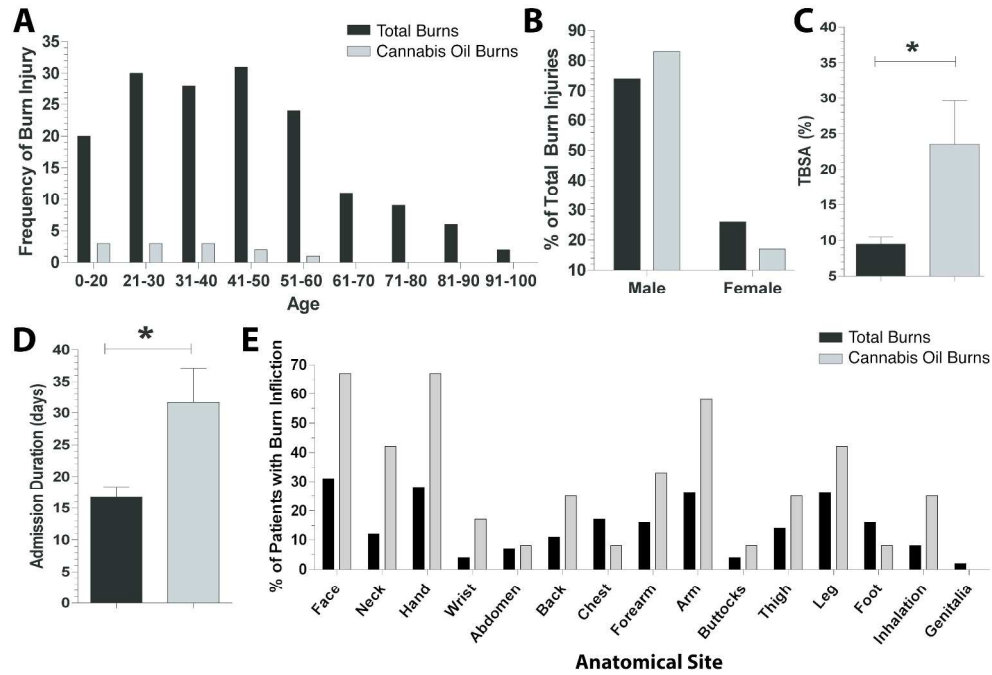

Differential features of cannabis oil burn patients compared to 161 adult patients admitted over the 2-year review period. The age distribution of cannabis oil burn patients is compared to the total burn population by plotting the frequency of patients which fall within the identified 10-year age range (A). The gender distribution highlights a bias towards male burn victims and this bias is especially pronounced in the cannabis oil burn group (B). Cannabis oil burn patients, on average, sustain a significantly higher % TBSA burn (C) and spend a greater number of days at the burn unit (D). Anatomical sites inflicted with burns is compared between the two groups by plotting the percentage of patients which sustained burns to the identified site (E). Error bars represent SEM. \* =  $p < 0.05$ .

300x205mm (300 x 300 DPI)

1  
2  
3  
4  
5  
6  
7  
8  
9  
10  
11  
12  
13  
14  
15  
16  
17  
18  
19  
20  
21  
22  
23  
24  
25  
26  
27  
28  
29  
30  
31  
32  
33  
34  
35  
36  
37  
38  
39  
40  
41  
42  
43  
44  
45  
46  
47  
48  
49

| Authors               | Year | # of Cases | Hospital                                                                          | Location                  | Gender         | Ethnicity                                            | Race                                                                                             | TBSA           | Admission Duration | Treatment                                                                                                    | Mortality |
|-----------------------|------|------------|-----------------------------------------------------------------------------------|---------------------------|----------------|------------------------------------------------------|--------------------------------------------------------------------------------------------------|----------------|--------------------|--------------------------------------------------------------------------------------------------------------|-----------|
| Bell et al. [5]       | 2015 | 29         | University of Colorado Hospital Burn Center                                       | Colorado, US              | Males (89.7 %) | Hispanic (10.3%); Non-Hispanic (82.8%); Other (6.9%) | Caucasian (72.4%); African American (17.2%); Asian (0%); American Indian (6.9%); Hawaiian (3.5%) | 10% (1-90)     | 10 days (1-53)     | Skin grafting (65.5%); Wound care only (27.6%); Surgical fracture repair (3.4%); Surgical debridement (3.4%) | 0%        |
| Porter et al. [6]     | 2004 | 9          | Christchurch Hospital                                                             | Christchurch, New Zealand | Males (75%)    | N.R.                                                 | N.R.                                                                                             | 13.3% (2-50)   | 16.7 days (1-57)   | Skin grafting and debridement (66.7%); Wound care only (33.3%)                                               | 0%        |
| Jensen et al. [3]     | 2015 | 8          | University of California Davis Medical Center and Shriners Hospitals for Children | Northern California, US   | Males (87.5%)  | N.R.                                                 | N.R.                                                                                             | 49.9% (16-96)  | 118.3 days (5-472) | Skin grafting (75%)                                                                                          | N.R.      |
| Romanowski et al. [7] | 2017 | 101        | Shriners Hospital                                                                 | Northern California, US   | Males (93.1%)  | N.R.                                                 | N.R.                                                                                             | 26.8% (0.5-95) | 27.1 days (0-513)  | Skin grafting (44.6%)                                                                                        | 3%        |
| Monte et al. [8]      | 2015 | 31         | University of Colorado burn center                                                | Colorado, US              | N.R.           | N.R.                                                 | N.R.                                                                                             | N.R.           | N.R.               | Skin grafting (67.7%)                                                                                        | N.R.      |
| Sinha & Ricord et al. | 2017 | 12         | Foothills Medical Centre                                                          | Alberta, Canada           | Males (83.3%)  | N.R.                                                 | N.R.                                                                                             | 23.5% (3-70)   | 31.7 days (3-69)   | Excision of burns (91.7%); Skin grafting (66.7%)                                                             | 8.30%     |

| Case # | Cause of Injury                             | Burn Sites                                                                                | Burn Depth                                                     | TBSA (%) | Surgery                                                                                                                                                                     | Admission Duration | Outcome          |
|--------|---------------------------------------------|-------------------------------------------------------------------------------------------|----------------------------------------------------------------|----------|-----------------------------------------------------------------------------------------------------------------------------------------------------------------------------|--------------------|------------------|
| 1      | Explosion due to cannabis oil manufacturing | L<br>A                                                                                    | FT, DPP<br>SPT                                                 | 14.75    | EOB (legs)<br>STSG (thighs)                                                                                                                                                 | 24                 | DC Jail          |
| 2      | Explosion due to cannabis oil manufacturing | A<br>L<br>H (LEFT)                                                                        | S-DPT<br>S-DPT<br>DPT                                          | 10       | EOB (L arm)                                                                                                                                                                 | 16                 | DC Home          |
| 3      | Explosion due to cannabis oil manufacturing | F,N<br>H (LEFT)<br>H (RIGHT)<br>I                                                         | DPT<br>DPT<br>DPT                                              | 12       | EOB on hands (bilateral)<br>STSG (from thighs)<br>EOB (ant. Scalp and face)                                                                                                 | 38                 | DC Home          |
| 4      | Explosion due to cannabis oil manufacturing | A<br>L<br>B<br>F<br>I                                                                     | FT<br>FT<br>FT<br>DPT                                          | 70       | DL<br>Allograft<br>STSG (from scalp)                                                                                                                                        | 29                 | Died in hospital |
| 5      | Explosion due to cannabis oil manufacturing | RUE<br>LUE<br>C/Abd<br>H/W<br>(RIGHT)<br>H/W<br>(LEFT)<br>F (RIGHT)<br>F (LEFT)<br>N<br>T | FT, DPT<br>FT, DPT<br>FT<br>FT<br>FT<br>FT<br>FT<br>DPT<br>SPT | 27       | Escharotomies (bilateral UE)<br>EOB (right arm/hand/wrist)<br>STSG (from R thigh and calf)<br>EOB (left arm/hand/wrist)<br>STSG (from L thigh and calf)<br>STSG (C and Abd) | 52                 | DC Home          |
| 6      | Explosion due to cannabis oil manufacturing | H (RIGHT)<br>H (LEFT)<br>F                                                                | DPT,<br>SPT<br>DPT,<br>SPT                                     | 5        | EOB (bilateral hands)<br>EOB (right arm/hand/wrist)                                                                                                                         | 20                 | DC Home          |

1  
2  
3  
4  
5  
6  
7  
8  
9  
10  
11  
12  
13  
14  
15  
16  
17  
18  
19  
20  
21  
22  
23  
24  
25  
26  
27  
28  
29  
30  
31  
32  
33  
34  
35  
36  
37  
38  
39  
40  
41  
42  
43  
44  
45  
46  
47  
48  
49

|    |                                             |                                                     |                                                                 |      |                                                                                                                                                                                                                                  |    |         |
|----|---------------------------------------------|-----------------------------------------------------|-----------------------------------------------------------------|------|----------------------------------------------------------------------------------------------------------------------------------------------------------------------------------------------------------------------------------|----|---------|
|    |                                             |                                                     | SPT                                                             |      |                                                                                                                                                                                                                                  |    |         |
| 7  | Explosion due to cannabis oil manufacturing | H (RIGHT)<br>H (LEFT)<br>F                          | FT<br>FT<br>DPT,<br>SPT                                         | 7    | EOB (bilateral hands)<br>EOB (right arm/hand/wrist)                                                                                                                                                                              | 20 | DC Home |
| 8  | Explosion due to cannabis oil manufacturing | F<br>H                                              | SPT<br>DPT,<br>SPT                                              | 3    |                                                                                                                                                                                                                                  | 3  | DC Home |
| 9  | Explosion due to cannabis oil manufacturing | T, L (RIGHT)<br>T, L (LEFT)<br>RUE<br>LUE<br>F,N    | DPT,<br>SPT<br>DPT,<br>SPT<br>DPT,<br>SPT<br>DPT,<br>SPT<br>SPT | 25   | EOB (arms/hands/legs)<br>STSG (bilateral legs)                                                                                                                                                                                   | 18 | DC Home |
| 10 | Explosion due to cannabis oil manufacturing | F,N<br>B<br>RUE<br>LUE<br>H,W (RIGHT)<br>H,W (LEFT) | FT<br>FT<br>FT<br>FT<br>FT<br>FT                                | 53.5 | Faschiotomy (bilateral arms and hands)<br>EOB (L arm/shoulder/hand wrist)<br>STSG (bilateral LE)<br>EOB (bilateral shoulders/back/buttocks)<br>STSG (from neck/back/buttocks)<br>EOB (scalp/face/neck)<br>STSG (chest/head/feet) | 69 | DC Home |
| 11 | Explosion due to cannabis oil manufacturing | F,N<br>B<br>RUE<br>LUE<br>H,W                       | FT<br>FT<br>FT<br>FT<br>FT                                      | 40   | EOB (L hand/wrist)<br>STSG (L hand/wrist)<br>EOB (face/scalp/neck)<br>STSG (chest)<br>EOB (bilateral UE)                                                                                                                         | 53 | DC Home |



|    |                                             |                                        |                                |    |                                                  |    |                              |
|----|---------------------------------------------|----------------------------------------|--------------------------------|----|--------------------------------------------------|----|------------------------------|
|    |                                             | (RIGHT)<br>H,W<br>(LEFT)<br>L<br>I     | FT<br>SPT                      |    |                                                  |    |                              |
| 12 | Explosion due to cannabis oil manufacturing | H<br>F,N<br>C<br>A (RIGHT)<br>A (LEFT) | FT<br>SPT<br>SPT<br>SPT<br>SPT | 15 | EOB (bilateral hands/forearms)<br>STSG (L thigh) | 38 | Transfer to another hospital |

Confidential

1  
2  
3  
4  
5  
6  
7  
8  
9  
10  
11  
12  
13  
14  
15  
16  
17  
18  
19  
20  
21  
22  
23  
24  
25  
26  
27  
28  
29  
30  
31  
32  
33  
34  
35  
36  
37  
38  
39  
40  
41  
42  
43  
44  
45  
46  
47  
48  
49  
50  
51  
52  
53  
54  
55  
56  
57  
58  
59  
60

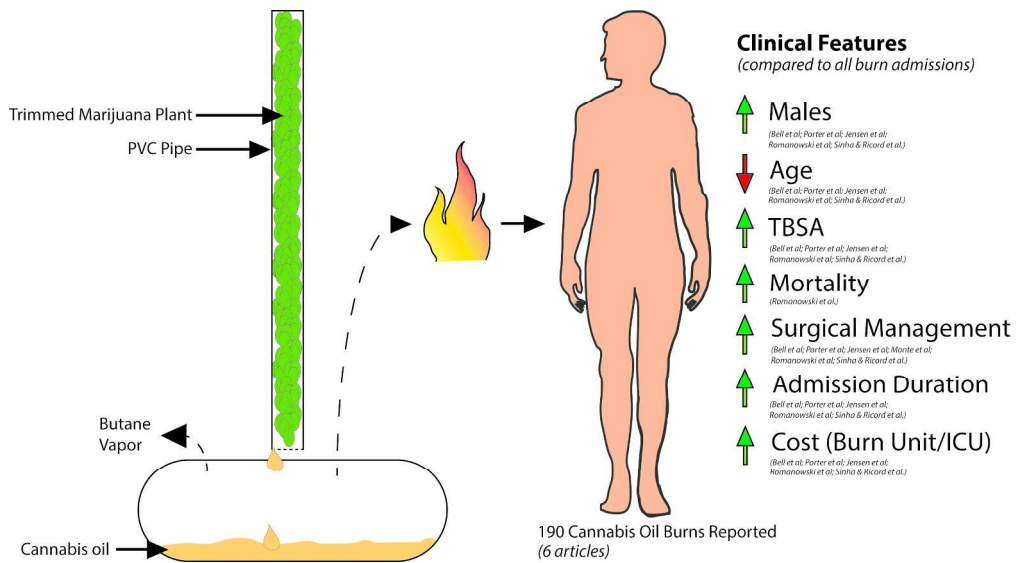

Schematic summary of cannabis oil extraction from cannabis trimmings and clinical features unique to cannabis oil burn patients as identified from 190 cases reported in the literature.

241x133mm (300 x 300 DPI)
